# Supplementary material for: A mitochondria-targeted fluorescent probe for hypochlorite sensing and its application in bioimaging
Source: Royal Society of Chemistry journal article supplement (doi:10.1039/d0an00245c), 2020-01-01
Supplement: d0an00245c1.pdf [file d0an00245c1.pdf]

## **A mitochondria-targeted fluorescent probe for hypochlorite sensing and its application in bioimaging**

Qing Yang<sup>a§</sup>, Xiuli Zhong<sup>a§</sup>, Yingshuang Chen<sup>a</sup>, Jing Yang<sup>a\*</sup>, Can Jin<sup>b\*</sup>, Yuliang Jiang<sup>a\*</sup>

a Nanjing Normal Univ, Jiangsu Collaborat Innovat Ctr Biomed Funct Mat, Jiangsu Key Lab Biofunct Mat, Sch Chem & Mat Sci, Nanjing 210023, Jiangsu, Peoples R China

b Institute of chemical Industry of Forest Products, Key Lab Biomass Energy & Mater Jiangsu Prov, National Engineering Lab Biomass Chem Utilizat, CAF, Nanjing 210042, Jiangsu, Peoples R China

### **Corresponding Authors**

Email: [07174@njnu.edu.cn](mailto:07174@njnu.edu.cn) (J. Yang)

Email: [envis@163.com](mailto:envis@163.com) (C. Jin)

Email: [07205@njnu.edu.cn](mailto:07205@njnu.edu.cn) (Y. L. Jiang)

## **List of contents**

1. Chemicals and apparatus
2. Synthesis of C-DAN
3.  $^1\text{H}$  NMR spectroscopy of C-DAN
4.  $^{13}\text{C}$  NMR spectroscopy of C-DAN
5. HRMS spectroscopy of C-DAN
6. UV-vis and fluorescent experiments
7. Comparison of probe C-DAN for the detection of  $\text{ClO}^-$
- 8 HRMS spectroscopy of C-DAN- $\text{OCl}^-$
9. Cytotoxicity of C-DAN
10. Detection of  $\text{ClO}^-$  in water samples

## 1. Chemicals and apparatus

4-(diethylamino)-2-hydroxybenzaldehyde, ethyl 3-oxobutanoate, phosphorus oxychloride, piperidine and 3-(4,5-dimethylthiazol-2-yl)-2,5-diphenyl tetrazolium bromide (MTT) were purchased from Adamas-beta® (Shanghai, China). Ethanol and dimethylformamide were analytical pure and distilled before used. Some other testing species such as  $\text{Co}^{2+}$ ,  $\text{Cu}^{2+}$ ,  $\text{Fe}^{2+}$ ,  $\text{Pb}^{2+}$ ,  $\text{Zn}^{2+}$ , GSH, Cys, Hcy,  $\text{HSO}_3^-$ ,  $\text{HSO}_4^-$ ,  $\text{H}_2\text{PO}_4^-$ ,  $\text{OH}^-$ ,  $\text{NO}_2^-$ ,  $\text{NO}_3^-$ ,  $\text{H}_2\text{O}_2$  were prepared in solutions according to the reported methods. Double-distilled water was used throughout all the experimental solutions. All samples were prepared at room temperature and were shaken for 1 min before each experiment.

Ultraviolet-Visible (UV-vis) absorption was recorded on Lambda 650s spectrophotometer (PerkinElmer, USA) and fluorescence spectra on F-7100 fluorescence spectrophotometer (Hitachi, Japan).  $^1\text{H}$  NMR and  $^{13}\text{C}$  NMR experiments were performed in  $d_6$ -DMSO on an AVANCE III HD AN-400 MHz spectrometer (Bruker, Germany). Mass spectroscopy was recorded on a LCMS-2020 spectrometer (Shimadzu, Japan). High resolution mass spectroscopy data was obtained on a high resolution Orbitrap Fusion Lumos (Thermo Fisher Scientific, USA). Fluorescence imaging experiments were measured by using A1 confocal laser scanning microscope (Nikon, Japan).

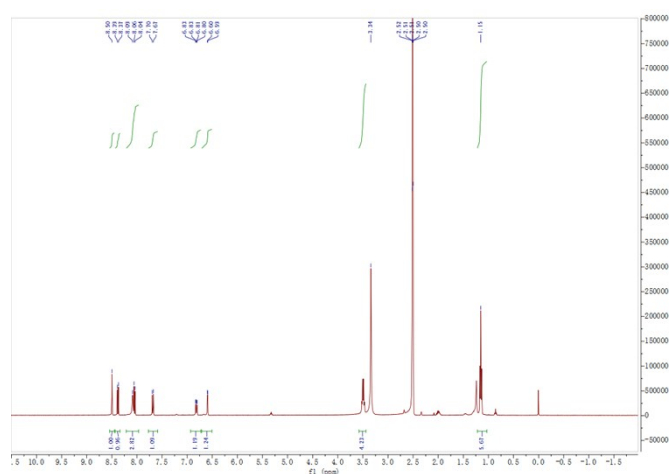

**Fig. S1**  $^1\text{H}$  NMR spectroscopy of C-DAN

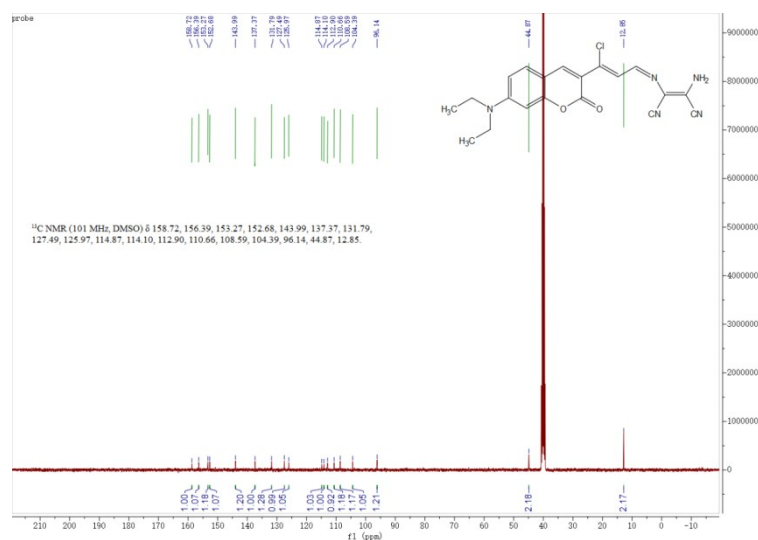

**Fig. S2** <sup>13</sup>C NMR spectroscopy of C-DAN

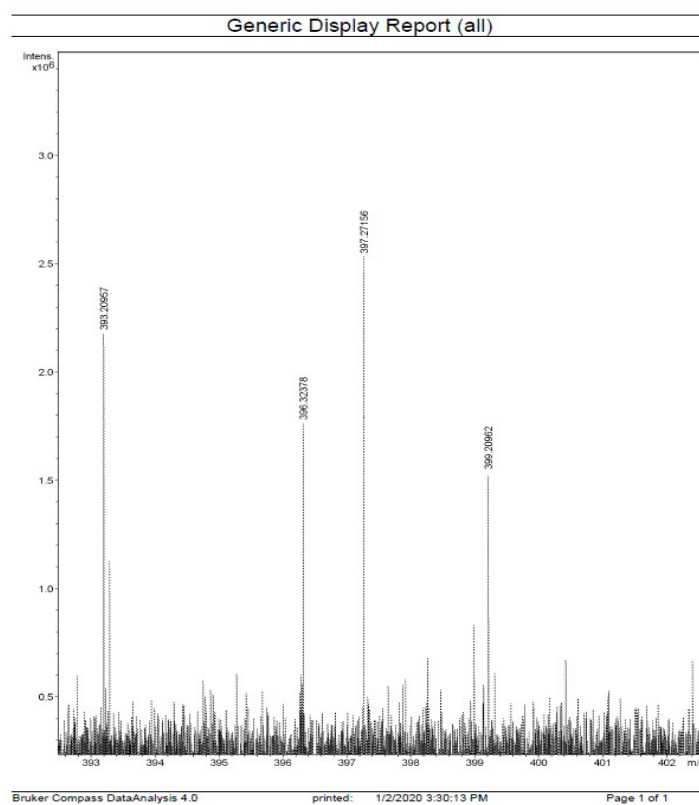

**Fig. S3** MS spectroscopy of C-DAN

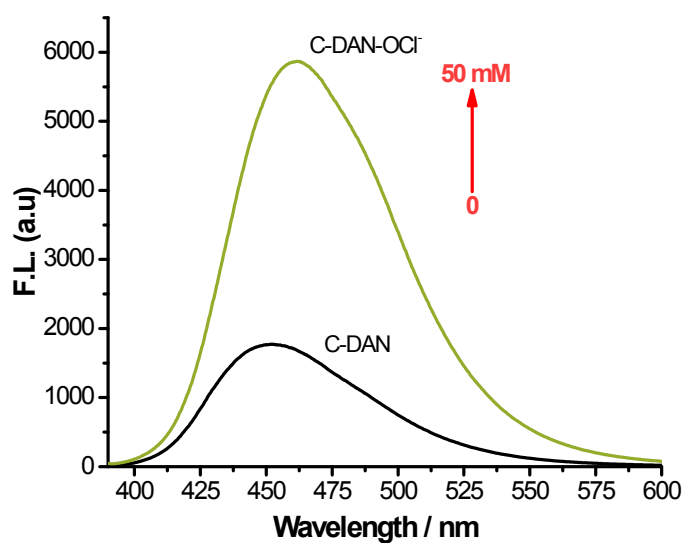

**Fig. S4** Fluorescence spectra of C-DAN and C-DAN-OCl<sup>-</sup>

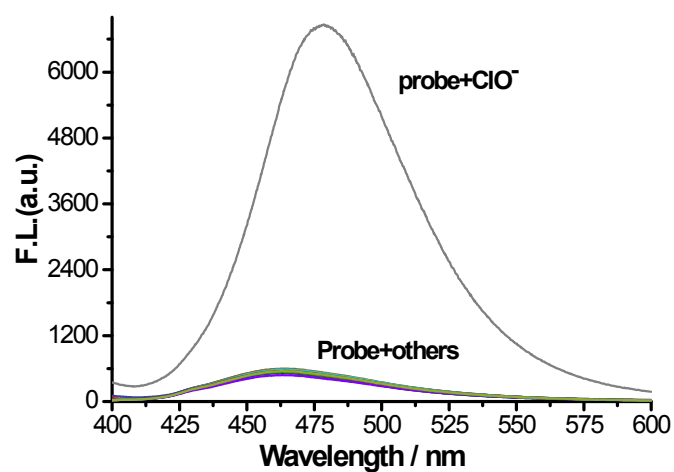

**Fig. S5** Fluorescence spectra response of Probe C-DAN in the presence of various anions( $\text{Co}^{2+}$ ,  $\text{Cu}^{2+}$ ,  $\text{Fe}^{2+}$ ,  $\text{Pb}^{2+}$ ,  $\text{Zn}^{2+}$ , GSH, Cys, Hcy,  $\text{HSO}_3^-$ ,  $\text{HSO}_4^-$ ,  $\text{H}_2\text{PO}_4^-$ ,  $\text{OH}^-$ ,  $\text{NO}_2^-$ ,  $\text{NO}_3^-$ , and  $\text{H}_2\text{O}_2$ ) in response to  $\text{ClO}^-$ .

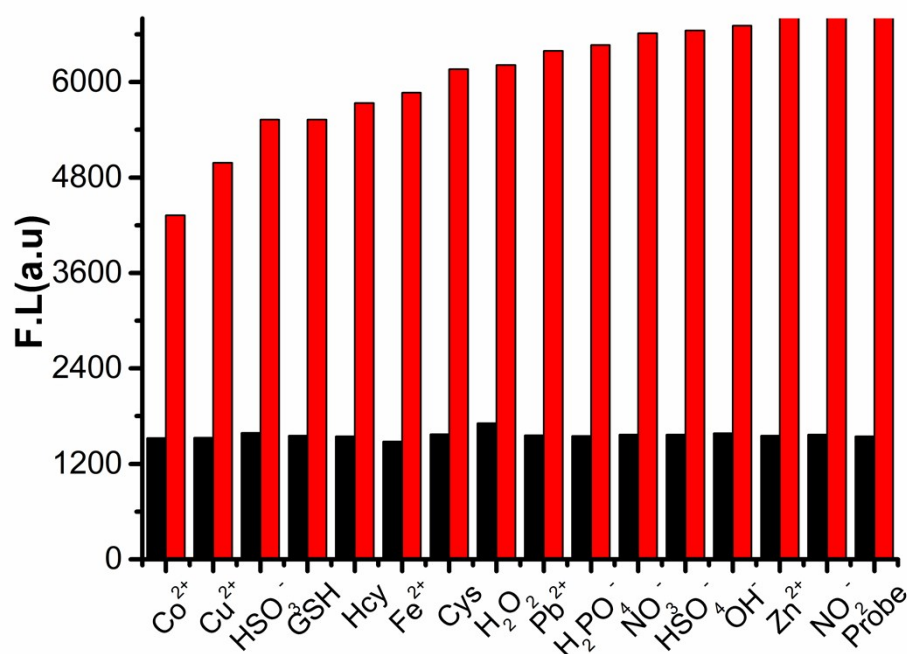

**Fig. S6** The fluorescence intensity when the probe C-DAN (10 mM) was added to the solutions in PBS (pH = 7.4). The black bars indicate the fluorescence response of C-DAN to the interfering substance.

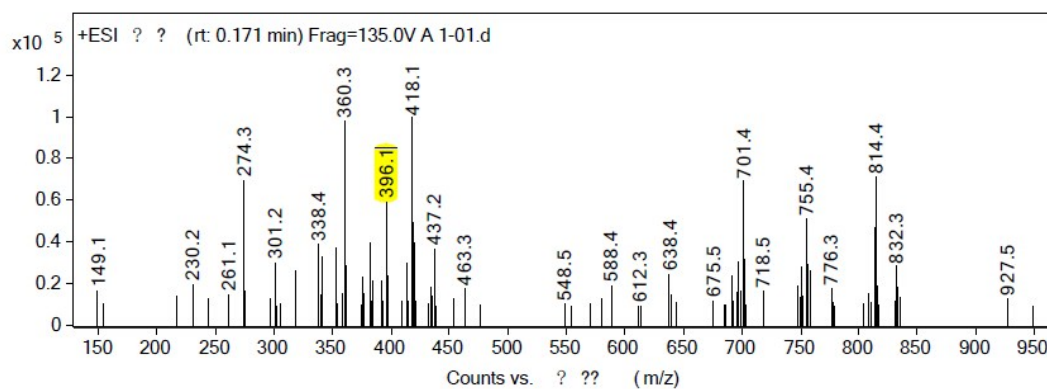

**Fig. S7** The MS spectroscopy of C-DAN /ClO<sup>-</sup>.

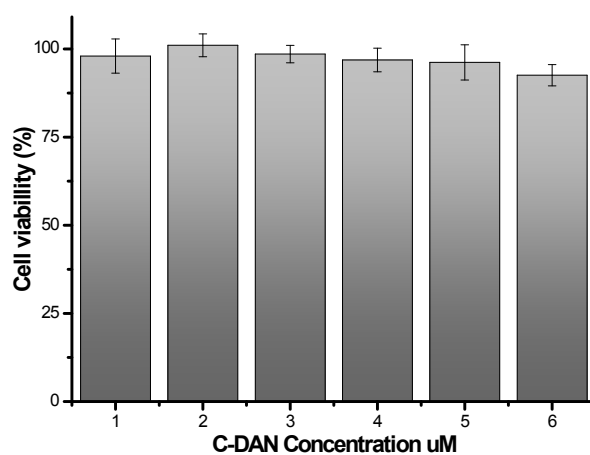

**Fig. S8** Cytotoxicity of C-DAN by a MTT assay (n = 3).

**Table S1** The testing results of ClO<sup>-</sup> concentration in tap water and river water samples (n=3)

| Samples     | Addition (mM) | Detection (mM) | Recovery (%) | RSD (%) |
|-------------|---------------|----------------|--------------|---------|
| Tap water   | 10            | 9.86           | 98.6         | 1.85    |
|             | 15            | 14.75          | 98.3         | 1.92    |
|             | 20            | 19.88          | 99.4         | 1.88    |
| River water | 10            | 9.78           | 97.8         | 1.86    |
|             | 15            | 15.02          | 102          | 1.98    |
|             | 20            | 19.65          | 98.3         | 1.93    |

RSD value reported is for n = 3.
